# Supplementary material for: Cu supported on polymeric carbon nitride for selective CO2 reduction into CH4: a combined kinetics and thermodynamics investigation
Source: Royal Society of Chemistry journal article supplement (doi:10.1039/c9ta05112k), 2019-01-01

## Electronic Supplementary Information for

### **Cu supported on polymeric carbon nitride for selective CO<sub>2</sub> reduction into CH<sub>4</sub>: a combined kinetics and thermodynamics investigation**

Jieyuan Li,<sup>a, b</sup> Ping Yan,<sup>a</sup> Kanglu Li,<sup>a</sup> Junjie You,<sup>a</sup> Hong Wang,<sup>b, c</sup> Wen Cui,<sup>b, d</sup> Wanglai Cen,<sup>a, e\*</sup>  
Yinghao Chu<sup>a\*</sup> and Fan Dong<sup>b</sup>

*a College of Architecture and Environment, Institute of New Energy and Low Carbon Technology, National Engineering Research Center for Flue Gas Desulfurization, Sichuan University, Chengdu, Sichuan 610065, China.*

*b Research Center for Environmental Science & Technology, Institute of Fundamental and Frontier Sciences, University of Electronic Science and Technology of China, Chengdu 611731, China.*

*c Chongqing Key Laboratory of Catalysis and New Environmental Materials, College of Environment and Resources, Chongqing Technology and Business University, Chongqing 400067, China.*

*d The Center of New Energy Materials and Technology, School of Materials Science and Engineering, Southwest Petroleum University, Chengdu 610500, China.*

*e Department of Chemistry, Institute for Computational Engineering and Sciences, University of Texas at Austin, Austin, Texas 78712-0165, United States.*

\*To whom the correspondence should be addressed.

Email: cenwanglai@163.com and chuyinghao@scu.edu.cn

## Table of Context

|                                                                                            |            |
|--------------------------------------------------------------------------------------------|------------|
| <b>Figures</b>                                                                             | <b>S2</b>  |
| Figure S1. Constructed calculation models                                                  | S2         |
| Figure S2. Site tests for Au/CN                                                            | S3         |
| Figure S3. Site tests for Cu/CN                                                            | S4         |
| Figure S4. Line profile of the ELF calculations                                            | S5         |
| Figure S5. CO <sub>2</sub> RR MEPs for the primary reaction pathways on Au/CN (part one)   | S6         |
| Figure S6. CO <sub>2</sub> RR MEPs for the primary reaction pathways on Au/CN (part two)   | S7         |
| Figure S7. CO <sub>2</sub> RR MEPs for the secondary reaction pathways on Au/CN (part one) | S8         |
| Figure S8. CO <sub>2</sub> RR MEPs for the secondary reaction pathways on Au/CN (part two) | S9         |
| Figure S9. MEP for the path 2 on pristine CN                                               | S10        |
| Figure S10. CO <sub>2</sub> RR MEPs for the primary reaction pathways on Cu/CN (part one)  | S11        |
| Figure S11. CO <sub>2</sub> RR MEPs for the primary reaction pathways on Cu/CN (part two)  | S12        |
| Figure S12. CO <sub>2</sub> RR MEPs for the secondary reaction pathways on Cu/CN           | S13        |
| <b>Tables</b>                                                                              | <b>S14</b> |
| Table S1. Summary of calculated results for the primary reaction pathways on Au/CN         | S14        |
| Table S2. Summary of calculated results for the secondary reaction pathways on Au/CN       | S15        |
| Table S3. Summary of calculated results for the primary reaction pathways on Cu/CN         | S16        |
| Table S4. Summary of calculated results for the secondary reaction pathways on Cu/CN       | S17        |
| <b>Reaction pathways</b>                                                                   | <b>S18</b> |
| Secondary reaction pathways on Au/CN                                                       | S18        |
| Secondary reaction pathways on Cu/CN                                                       | S19        |

**Figures:**

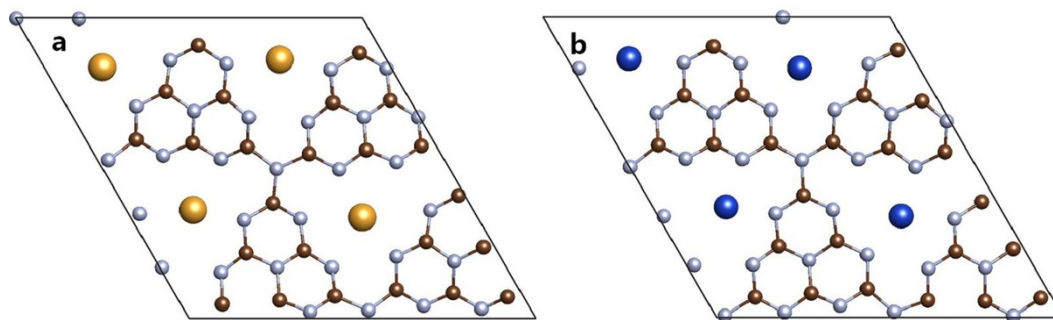

**Figure S1.** Constructed calculation models of Au/CN (a) and Cu/CN (b). Brown, grey, yellow and blue spheres refer to C, N, Au and Cu atoms respectively.

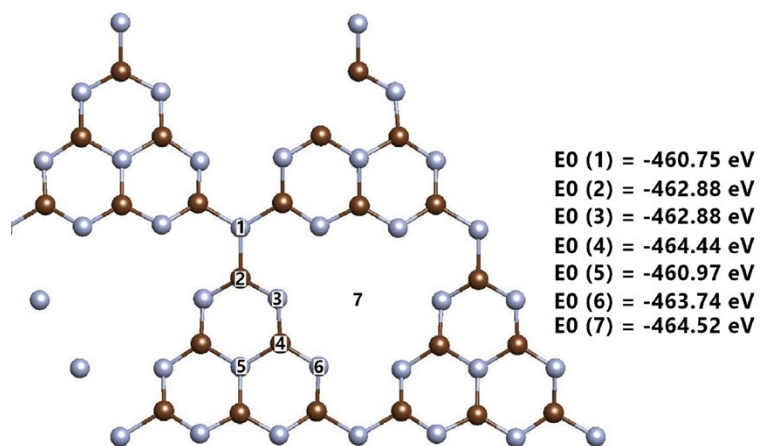

**Figure S2.** Site tests for Au atom loading into CN.

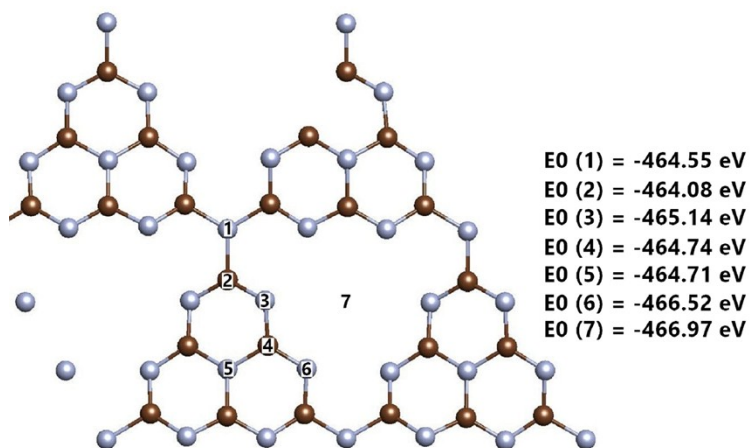

**Figure S3.** Site tests for Cu atom loading into CN.

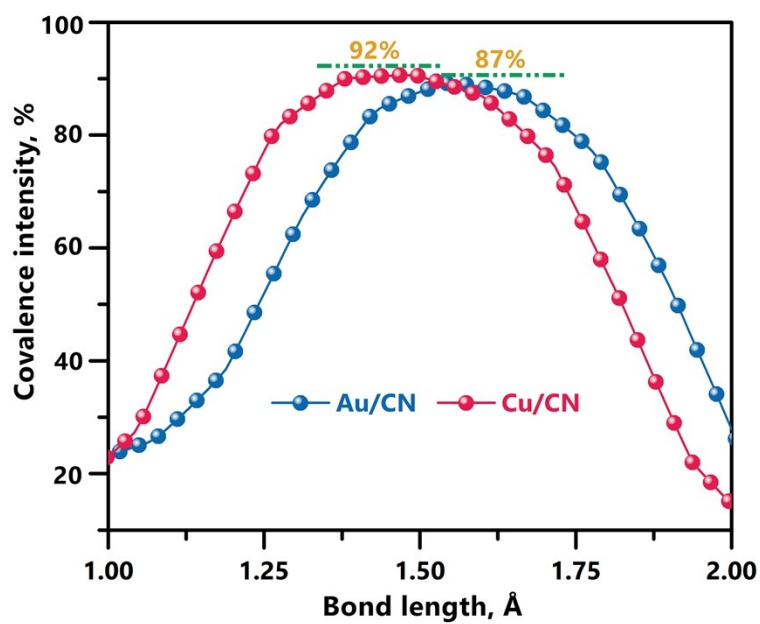

**Figure S4.** Line profile of the electronic localization function (ELF) calculations for Au/CN and Cu/CN.

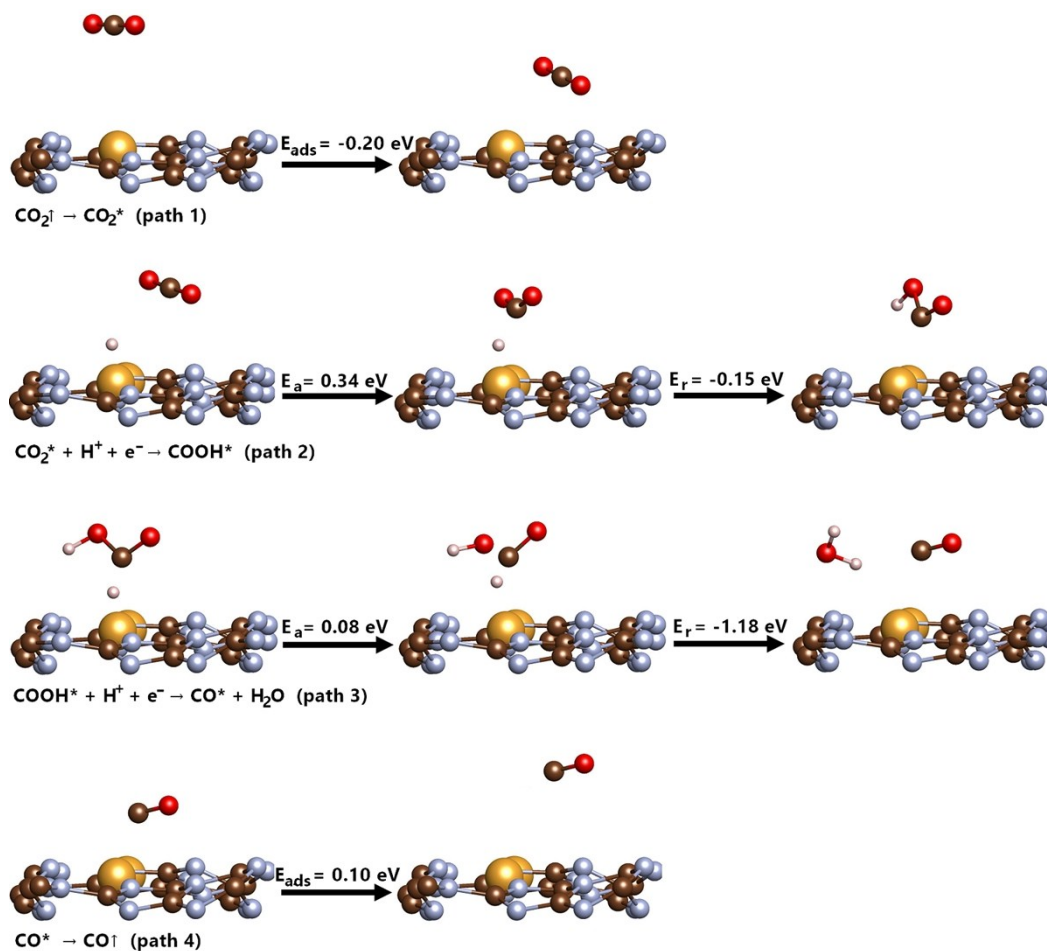

**Figure S5.** CO<sub>2</sub>RR MEPs for the primary reaction pathways on Au/CN (part one). The blue, brown, gold, red and pink spheres refer to N, C, Au, O and H atoms respectively. The positive and negative of energies depict energy absorption and release respectively.

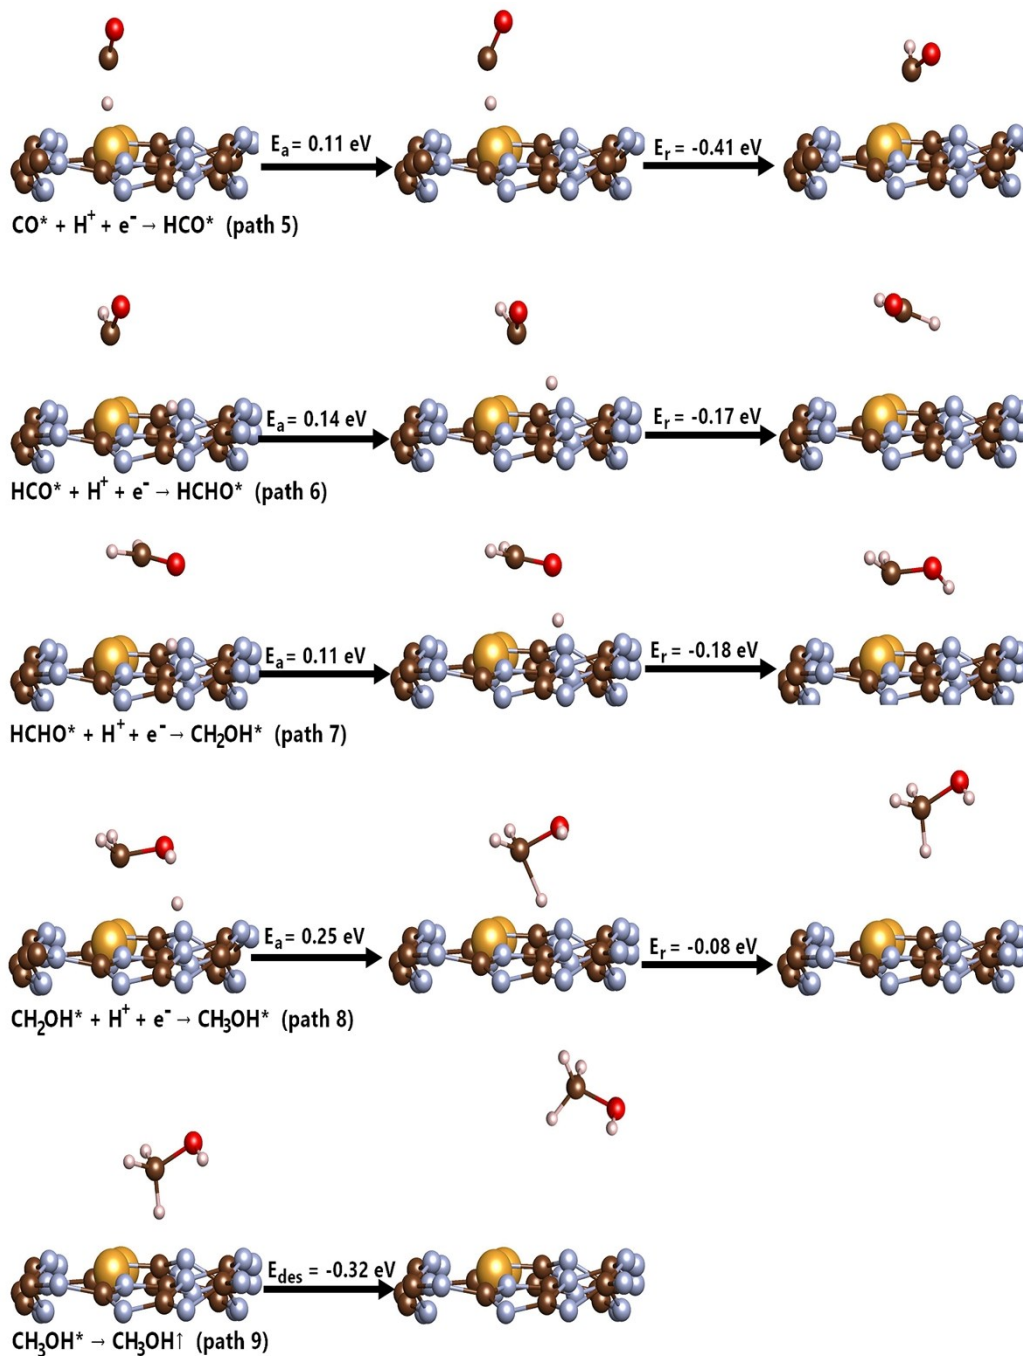

**Figure S6.** CO<sub>2</sub>RR MEPs for the primary reaction pathways on Au/CN (part two). The blue, brown, gold, red and pink spheres refer to N, C, Au, O and H atoms respectively. The positive and negative of energies depict energy absorption and release respectively.



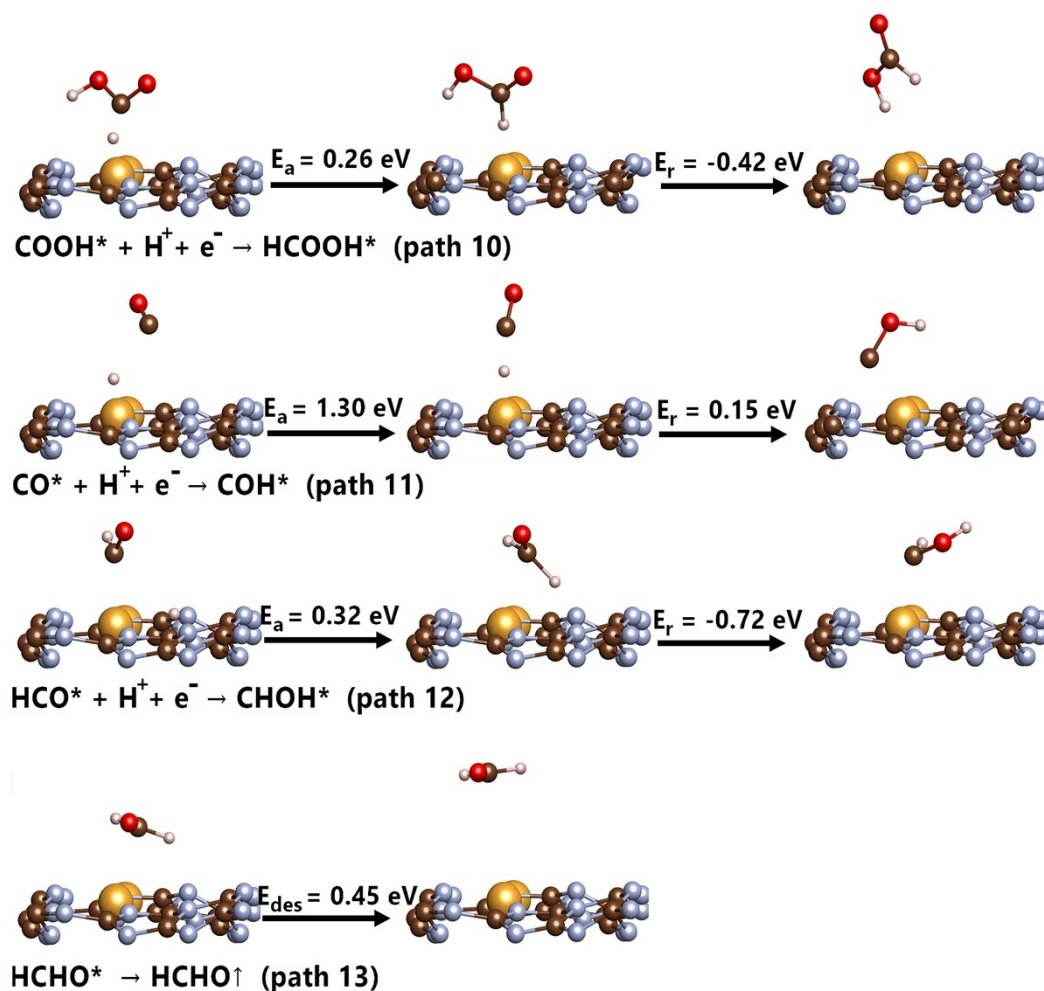

**Figure S7.** CO<sub>2</sub>RR MEPs for the secondary reaction pathways on Au/CN (part one). The blue, brown, gold, red and pink spheres refer to N, C, Au, O and H atoms respectively. The positive and negative of energies depict energy absorption and release respectively.

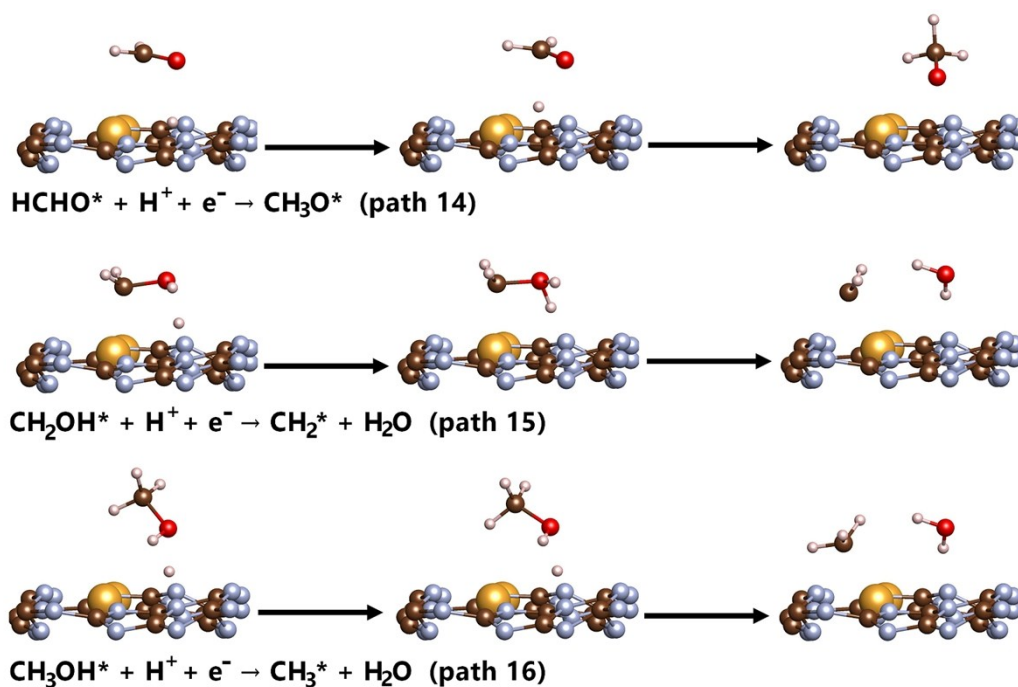

**Figure S8.** CO<sub>2</sub>RR MEPs for the secondary reaction pathways on Au/CN (part two). The blue, brown, gold, red and pink spheres refer to N, C, Au, O and H atoms respectively. The positive and negative of energies depict energy absorption and release respectively.

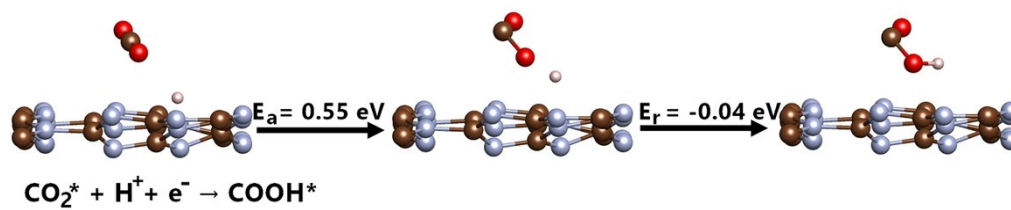

**Figure S9.** MEP for the path 2 on pristine CN. The blue, brown, red and pink spheres refer to N, C, O and H atoms respectively. The positive and negative of energies depict energy absorption and release respectively.

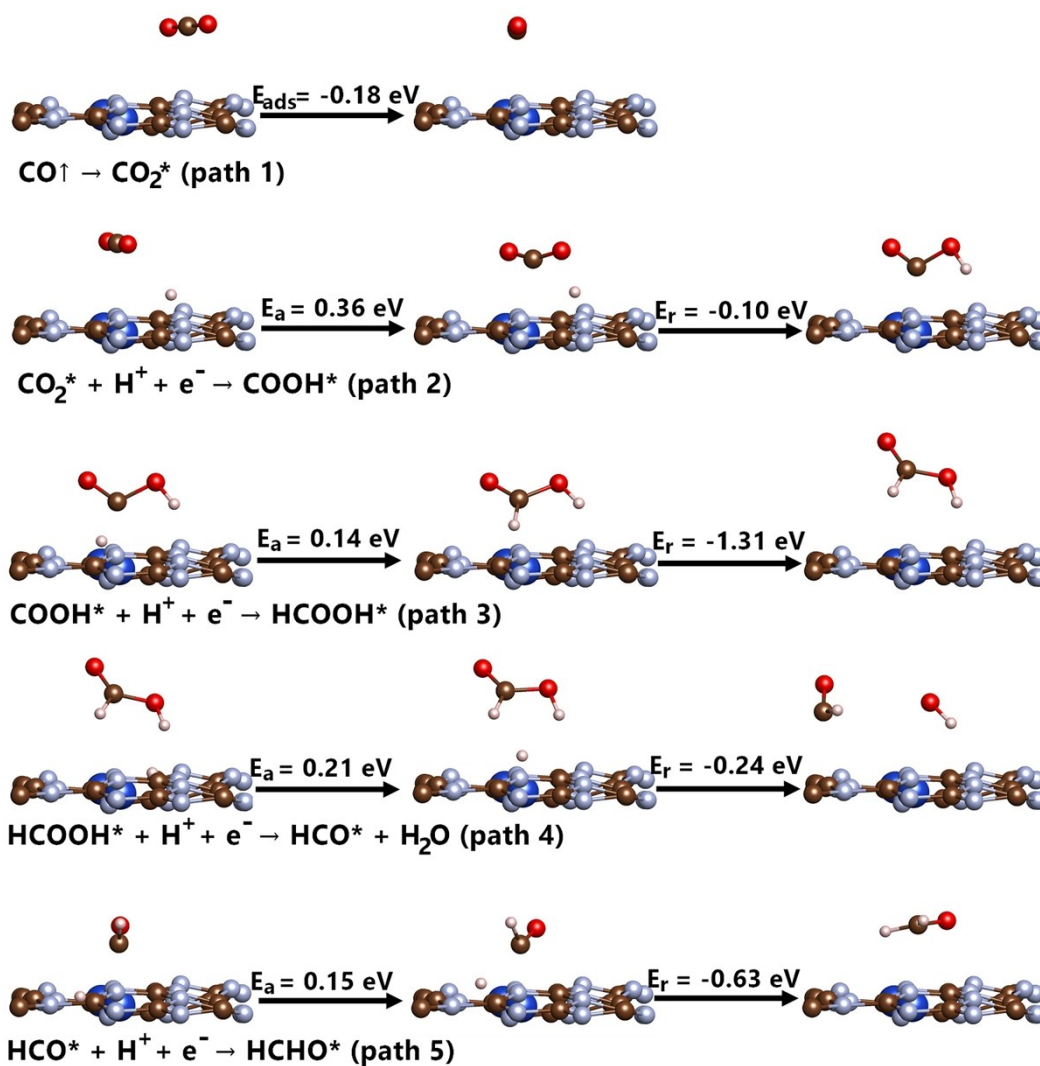

**Figure S10.** CO $_2$ RR MEPs for the primary reaction pathways on Cu/CN (part one). The light blue, brown, blue, red and pink spheres refer to N, C, Cu, O and H atoms respectively. The positive and negative of energies depict energy absorption and release respectively.

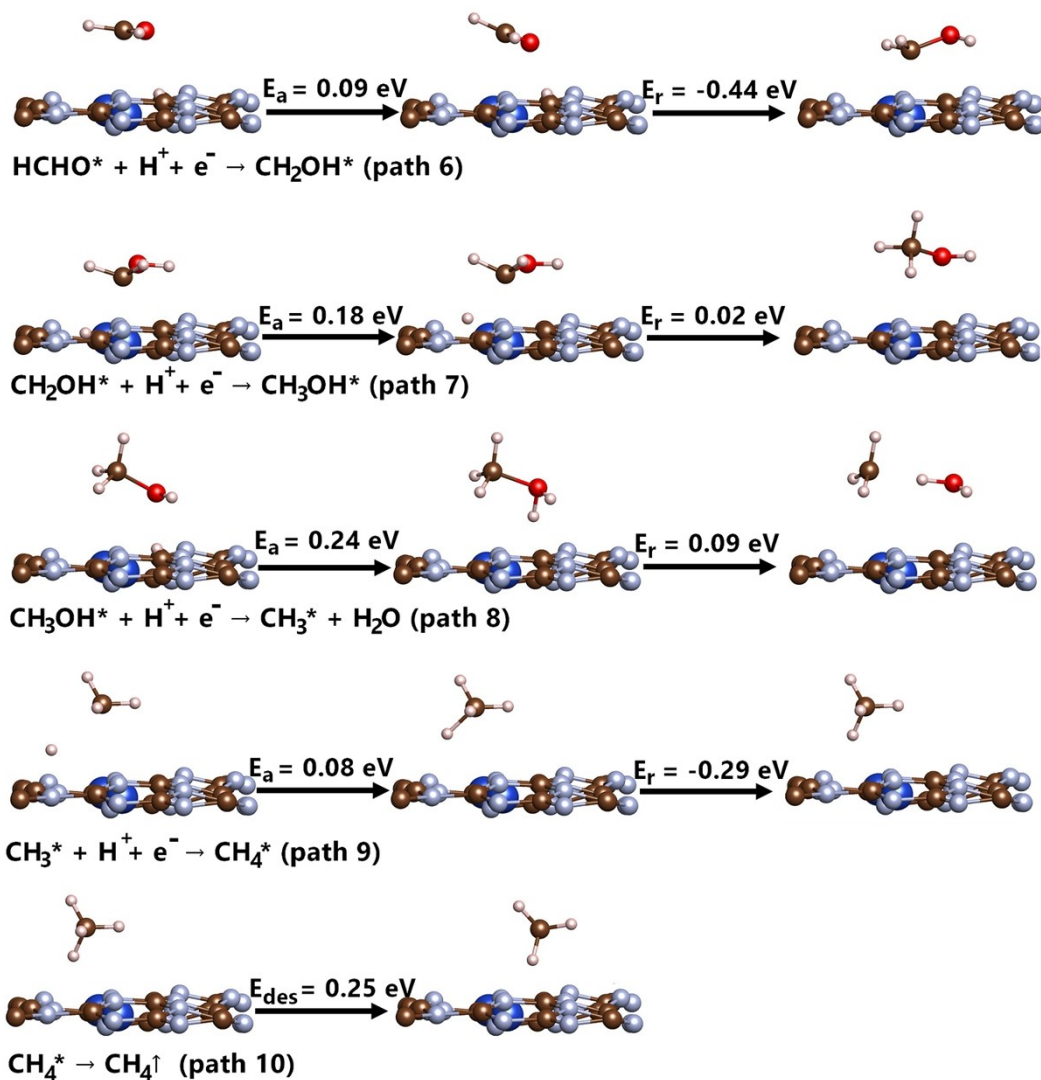

**Figure S11.** CO<sub>2</sub>RR MEPS for the primary reaction pathways on Cu/CN (part two). The light blue, brown, blue, red and pink spheres refer to N, C, Cu, O and H atoms respectively. The positive and negative of energies depict energy absorption and release respectively.

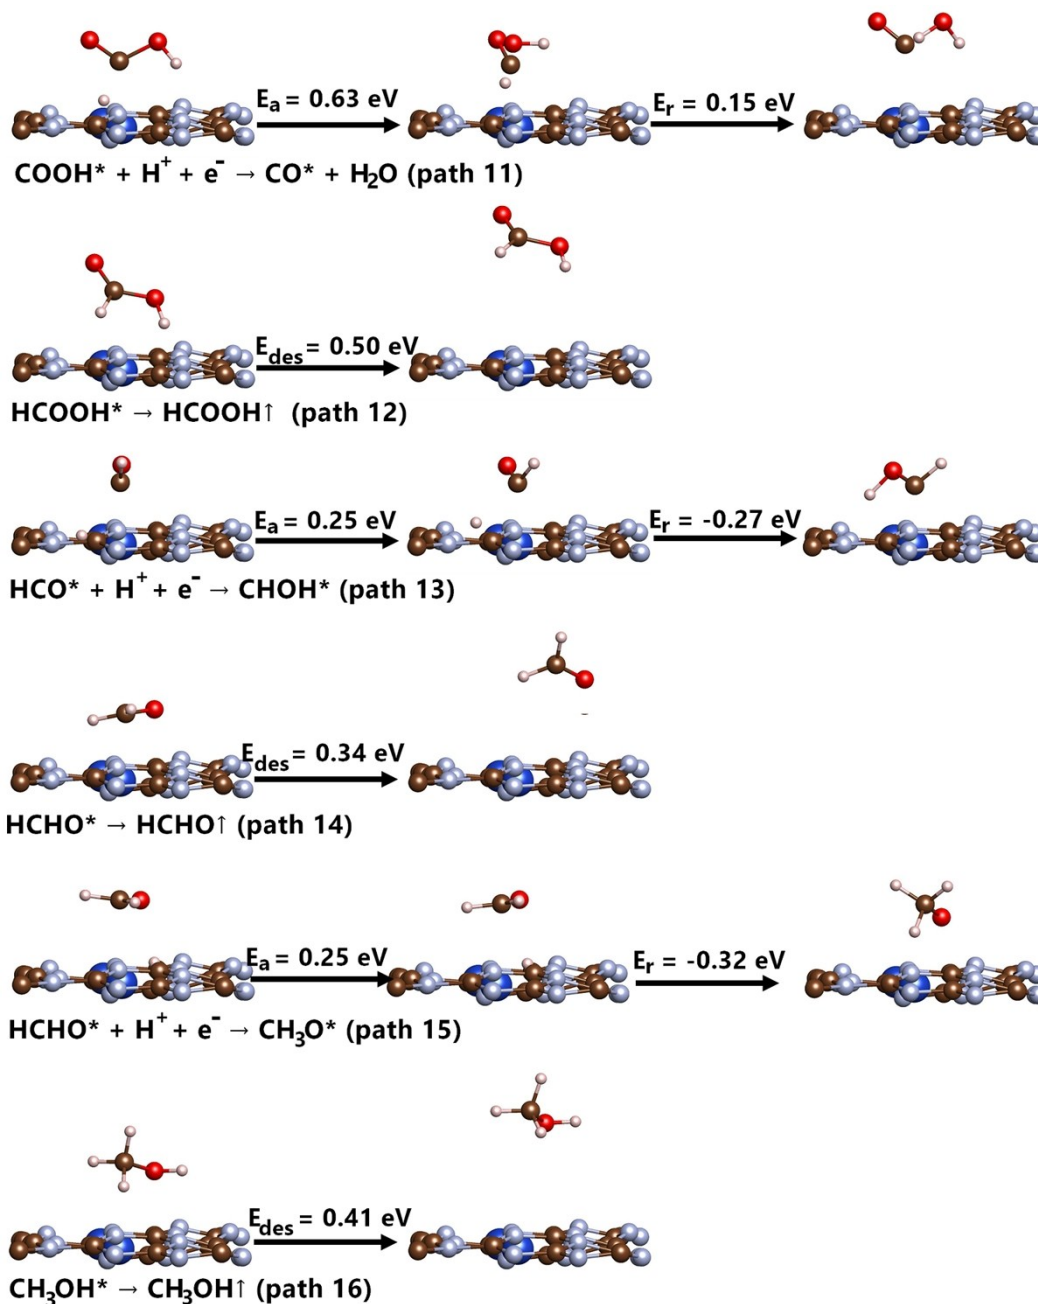

**Figure S12.** CO<sub>2</sub>RR MEPs for the secondary reaction pathways on Cu/CN. The light blue, brown, blue, red and pink spheres refer to N, C, Cu, O and H atoms respectively. The positive and negative of energies depict energy absorption and release respectively.

**Tables:****Table S1.** Summary of calculated results for the primary reaction pathways on Au/CN.

|        | $\Delta G_{\text{ads}}$ , eV | $\Delta G_{\text{a}}$ , eV | $\Delta G_{\text{r}}$ , eV | $\Delta G_{\text{des}}$ , eV | $f/i$ , $\text{cm}^{-1}$ |
|--------|------------------------------|----------------------------|----------------------------|------------------------------|--------------------------|
| path 1 | -0.19                        | /                          | /                          | /                            | /                        |
| path 2 | /                            | 0.34                       | -0.16                      | /                            | 401                      |
| path 3 | /                            | 0.08                       | -1.17                      | /                            | 205                      |
| path 4 | /                            | /                          | /                          | 0.11                         | /                        |
| path 5 | /                            | 0.12                       | -0.39                      | /                            | 145                      |
| path 6 | /                            | 0.15                       | -0.16                      | /                            | 247                      |
| path 7 | /                            | 0.17                       | -0.10                      | /                            | 198                      |
| path 8 | /                            | 0.23                       | -0.11                      | /                            | 332                      |
| path 9 | /                            | /                          | /                          | -0.32                        | /                        |

$\Delta G_{\text{ads}}$ ,  $\Delta G_{\text{a}}$ ,  $\Delta G_{\text{r}}$ ,  $\Delta G_{\text{des}}$  and  $f/i$  depict the adsorption free energy, activation free energy, reaction free energy, desorption free energy and imaginary frequency, respectively. Positive and negative of the energies refer to energy absorption and release respectively.

**Table S2.** Summary of calculated results for the secondary reaction pathways on Au/CN.

|         | $\Delta G_a$ , eV | $\Delta G_r$ , eV | $\Delta G_{des}$ , eV | $f/i$ , cm <sup>-1</sup> |
|---------|-------------------|-------------------|-----------------------|--------------------------|
| path 10 | 0.28              | -0.44             | /                     | 357                      |
| path 11 | 1.30              | 0.15              | /                     | 542                      |
| path 12 | 0.32              | -0.72             | /                     | 264                      |
| path 13 | /                 | /                 | 0.45                  | /                        |
| path 14 | 0.92              | -0.09             | /                     | 574                      |
| path 15 | 1.34              | 0.47              |                       |                          |
| path 16 | 0.99              | 0.15              | /                     | 662                      |

$\Delta G_a$ ,  $\Delta G_r$ ,  $\Delta G_{des}$  and  $f/i$  depict the activation free energy, reaction free energy, desorption free energy and imaginary frequency, respectively. Positive and negative of the energies refer to energy absorption and release respectively.



**Table S3.** Summary of calculated results for the primary reaction pathways on Cu/CN.

|         | $\Delta G_{\text{ads}}$ , eV | $\Delta G_{\text{a}}$ , eV | $\Delta G_{\text{r}}$ , eV | $\Delta G_{\text{des}}$ , eV | $f/i$ , $\text{cm}^{-1}$ |
|---------|------------------------------|----------------------------|----------------------------|------------------------------|--------------------------|
| path 1  | -0.18                        | /                          | /                          | /                            | /                        |
| path 2  | /                            | 0.37                       | -0.11                      | /                            | 224                      |
| path 3  | /                            | 0.13                       | -1.28                      | /                            | 111                      |
| path 4  | /                            | 0.22                       | -0.22                      | /                            | 254                      |
| path 5  | /                            | 0.17                       | -0.68                      | /                            | 191                      |
| path 6  | /                            | 0.10                       | -0.46                      | /                            | 209                      |
| path 7  | /                            | 0.18                       | 0.02                       | /                            | 275                      |
| path 8  | /                            | 0.24                       | 0.09                       | /                            | 176                      |
| path 9  | /                            | 0.08                       | -0.27                      | /                            | 254                      |
| path 10 | /                            | /                          | /                          | 0.25                         | /                        |

$\Delta G_{\text{ads}}$ ,  $\Delta G_{\text{a}}$ ,  $\Delta G_{\text{r}}$ ,  $\Delta G_{\text{des}}$  and  $f/i$  depict the adsorption free energy, activation free energy, reaction free energy, desorption free energy and imaginary frequency, respectively. Positive and negative of the energies refer to energy absorption and release respectively.

**Table S4.** Summary of calculated results for the secondary reaction pathways on Cu/CN.

|         | $\Delta G_a$ , eV | $\Delta G_r$ , eV | $\Delta G_{des}$ , eV | $f/i$ , cm <sup>-1</sup> |
|---------|-------------------|-------------------|-----------------------|--------------------------|
| path 11 | 0.64              | 0.18              | /                     | 499                      |
| path 12 | /                 | /                 | 0.51                  | /                        |
| path 13 | 0.26              | -0.29             | /                     | 287                      |
| path 14 | /                 | /                 | 0.33                  | /                        |
| path 15 | 0.25              | -0.30             | /                     | 195                      |
| path 16 | /                 | /                 | 0.41                  | /                        |

$\Delta G_a$ ,  $\Delta G_r$ ,  $\Delta G_{des}$  and  $f/i$  depict the activation energy, reaction energy, desorption energy and imaginary frequency, respectively. Positive and negative of the energies refer to energy absorption and release respectively.

## Reaction pathways:

### Secondary reaction pathways on Au/CN

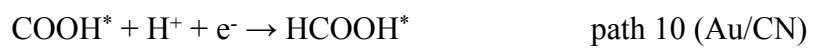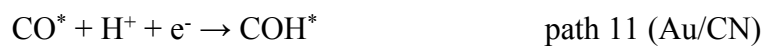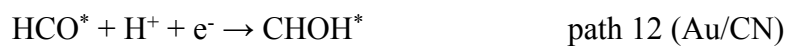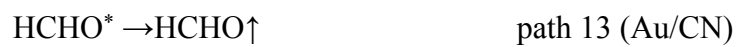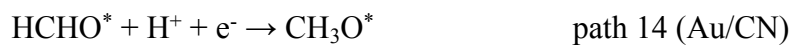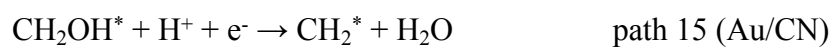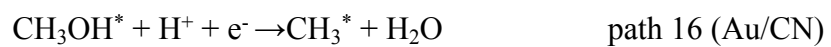

Secondary reaction pathways on Cu/CN

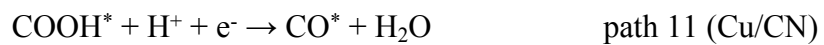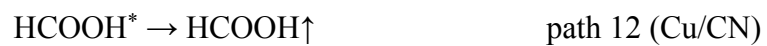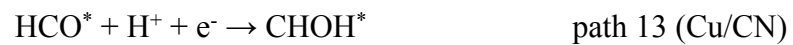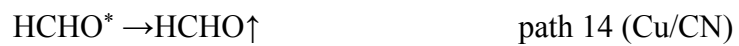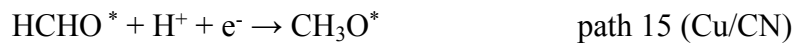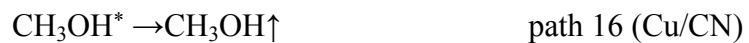

Supplement: c9ta05112k1.pdf [file c9ta05112k1.pdf]
